# Supplementary material for: Temporal Trends in Treatment and Outcomes of Acute Myocardial Infarction in Patients With Chronic Obstructive Pulmonary Disease: A Nationwide Population‐Based Observational Study
Source: PubMed Central journal article supplement — J Am Heart Assoc. 2017 Mar 15;6(3):e004525. doi: 10.1161/JAHA.116.004525 (PMC5524002; doi:10.1161/jaha.116.004525), 2017-03-15
Supplement: JAH3-6-e004525-s001.pdf [file JAH3-6-e004525-s001.pdf]

## **Supplemental Material**

**Table S1. Effects of in-hospital medications and cardiovascular prescriptions in the study cohort.**

|                             | Dual antiplatelets |           | Anticoagulants |           | β-blockers |           | CCB   |           | ACEI/ARB |           | Statins |           |
|-----------------------------|--------------------|-----------|----------------|-----------|------------|-----------|-------|-----------|----------|-----------|---------|-----------|
|                             | OR                 | 95% CI    | OR             | 95% CI    | OR         | 95% CI    | OR    | 95% CI    | OR       | 95% CI    | OR      | 95% CI    |
| COPD                        | 0.87*              | 0.75–1.00 | 0.82*          | 0.70–0.95 | 0.71*      | 0.63–0.80 | 1.04  | 0.91–1.17 | 0.82*    | 0.73–0.93 | 0.89    | 0.79–1.01 |
| Inhalation therapy†         |                    |           |                |           | 0.93       | 0.81–1.07 | 1.24* | 1.07–1.43 |          |           | 0.85*   | 0.74–0.98 |
| Theophylline                | 0.80*              | 0.66–0.97 | 0.75*          | 0.61–0.91 | 0.60*      | 0.50–0.71 | 1.22* | 1.02–1.46 |          |           | 0.97    | 0.80–1.18 |
| Oral β-agonists             | 0.83               | 0.65–1.07 | 0.85           | 0.65–1.10 | 0.73*      | 0.58–0.93 | 0.99  | 0.78–1.25 |          |           | 0.67*   | 0.51–0.88 |
| Mucolytic agents            |                    |           |                |           |            |           | 1.43* | 1.18–1.74 |          |           | 1.10    | 0.97–1.25 |
| Cough and cold preparations | 1.37*              | 1.20–1.57 | 1.34*          | 1.16–1.55 | 1.34*      | 1.19–1.50 | 1.01  | 0.85–1.22 | 1.31*    | 1.17–1.48 |         |           |
| Antibiotics                 | 0.45*              | 0.39–0.52 | 0.46*          | 0.39–0.53 | 0.69*      | 0.61–0.77 | 1.11  | 0.98–1.26 | 0.55*    | 0.49–0.63 | 0.65*   | 0.58–0.74 |
| Diuretics                   | 1.54*              | 1.34–1.77 | 1.53*          | 1.32–1.79 | 1.55*      | 1.37–1.75 | 1.61* | 1.42–1.82 | 1.78*    | 1.57–2.01 |         |           |
| Anti-arrhythmics            |                    |           | 1.36*          | 1.15–1.60 | 0.78*      | 0.68–0.89 |       |           | 0.78*    | 0.68–0.88 | 0.82*   | 0.72–0.93 |

For each cardiovascular medication in the first row of the table, we performed univariable analysis that included variables in the first column of the table. Variables with *P* values of <.15 were subjected to multivariable analysis. \* *P* < .05

All models (both univariable and multivariable) were adjusted for age, sex, socioeconomic status, year of hospitalization, hospital length of stay, and comorbidities.

†Inhalation therapy included bronchodilator inhalation, steroid inhalation, and mucolytic inhalation therapy.

Abbreviations: ACEI/ARB, angiotensin-converting enzyme inhibitor/angiotensin II receptor blocker; CCB, calcium channel blockers; CI, confidence interval; COPD, chronic obstructive pulmonary disease; OR, odds ratio.

**Table S2. Temporal trends of in-hospital treatment in acute myocardial infarction patients with or without chronic obstructive pulmonary disease between 2004 and 2013.**

| Treatment received (%)      | 2004/05 | 2006/07 | 2008/09 | 2010/11 | 2012/13 | P <sub>trends</sub> |
|-----------------------------|---------|---------|---------|---------|---------|---------------------|
| <b>Dual antiplatelets</b>   |         |         |         |         |         |                     |
| COPD                        | 46.7    | 62.1    | 72.3    | 78.4    | 81.8    | <.0001              |
| non-COPD                    | 59.1    | 73.9    | 81.1    | 83.0    | 89.4    | <.0001              |
| <b>Anticoagulants</b>       |         |         |         |         |         |                     |
| COPD                        | 70.7    | 71.6    | 74.6    | 77.1    | 80.8    | .0003               |
| non-COPD                    | 79.5    | 82.2    | 84.2    | 84.0    | 89.1    | <.0001              |
| <b>β-blockers</b>           |         |         |         |         |         |                     |
| COPD                        | 35.4    | 44.5    | 45.2    | 48.9    | 49.9    | .0003               |
| non-COPD                    | 60.2    | 59.5    | 61.9    | 59.1    | 64.7    | .0784               |
| <b>CCB</b>                  |         |         |         |         |         |                     |
| COPD                        | 44.1    | 39.1    | 43.1    | 38.7    | 39.4    | .2690               |
| non-COPD                    | 37.4    | 34.8    | 35.1    | 33.2    | 31.3    | .0035               |
| <b>ACEI/ARB</b>             |         |         |         |         |         |                     |
| COPD                        | 55.9    | 62.5    | 58.4    | 63.7    | 58.6    | .6390               |
| non-COPD                    | 69.8    | 66.5    | 68.5    | 66.4    | 67.5    | .2986               |
| <b>Statin</b>               |         |         |         |         |         |                     |
| COPD                        | 23.6    | 25.6    | 39.1    | 45.6    | 49.1    | <.0001              |
| non-COPD                    | 31.3    | 38.4    | 51.4    | 56.9    | 64.0    | <.0001              |
| <b>Coronary angiography</b> |         |         |         |         |         |                     |
| COPD                        | 42.4    | 44.5    | 57.4    | 55.9    | 60.8    | <.0001              |
| non-COPD                    | 57.7    | 62.9    | 70.5    | 69.5    | 78.4    | <.0001              |
| <b>PCI</b>                  |         |         |         |         |         |                     |
| COPD                        | 24.0    | 32.2    | 43.1    | 43.5    | 48.7    | <.0001              |
| non-COPD                    | 34.7    | 48.2    | 57.9    | 57.1    | 66.3    | <.0001              |
| <b>CABG</b>                 |         |         |         |         |         |                     |
| COPD                        | 3.1     | 3.2     | 2.8     | 2.3     | 4.0     | .6114               |
| non-COPD                    | 6.7     | 6.8     | 5.4     | 4.3     | 3.5     | .0001               |

Interaction of group indicator of COPD with time: significant in β-blockers (P = .0075) and CABG (P = .0311) groups.

Abbreviations: ACEI/ARB, angiotensin converting enzyme inhibitor/angiotensin II receptor blocker; CABG, coronary artery bypass grafting; CCB, calcium channel blockers; COPD, chronic obstructive pulmonary disease; PCI, percutaneous coronary intervention.

**Table S3. Temporal trends in clinical outcomes in acute myocardial infarction patients with and without chronic obstructive pulmonary disease (COPD) between 2004 and 2013.**

| Mortality (%)       | 2004/05 | 2006/07 | 2008/09 | 2010/11 | 2012/13 | P <sub>trends</sub> |
|---------------------|---------|---------|---------|---------|---------|---------------------|
| In-hospital         |         |         |         |         |         |                     |
| COPD                | 29.7    | 26.5    | 26.1    | 24.4    | 23.4    | .0563               |
| non-COPD            | 18.4    | 18.1    | 14.0    | 16.0    | 11.4    | <.0001              |
| 90-days             |         |         |         |         |         |                     |
| COPD                | 33.2    | 30.0    | 30.5    | 31.1    | 27.3    | .1757               |
| non-COPD            | 22.5    | 21.9    | 17.2    | 19.8    | 14.3    | <.0001              |
| 1-year              |         |         |         |         |         |                     |
| COPD                | 46.3    | 43.5    | 40.6    | 41.6    | 33.1    | .0004               |
| non-COPD            | 29.1    | 27.2    | 23.7    | 26.0    | 19.8    | <.0001              |
| Respiratory failure |         |         |         |         |         |                     |
| COPD                | 36.2    | 35.3    | 27.4    | 28.8    | 26.3    | .0013               |
| non-COPD            | 26.4    | 24.1    | 21.8    | 21.1    | 17.2    | <.0001              |
| Shock episode       |         |         |         |         |         |                     |
| COPD                | 47.6    | 47.0    | 41.6    | 42.4    | 42.8    | .1329               |
| non-COPD            | 45.1    | 39.6    | 37.9    | 38.2    | 34.2    | <.0001              |

Interaction of group indicator of COPD with time: all non-significant.

**Table S4. The mortality of acute myocardial infarction between patients with and without chronic obstructive pulmonary disease (COPD) that received specific treatment.**

| Mortality                                                                | In-hospital |           |         | 90-days |           |         | 1-year |           |         |
|--------------------------------------------------------------------------|-------------|-----------|---------|---------|-----------|---------|--------|-----------|---------|
|                                                                          | aHR         | 95% CI    | P value | aHR     | 95% CI    | P value | aHR    | 95% CI    | P value |
| DAPT, $\beta$ -blockers, ACEI/ARB, statin and coronary revascularization | 1.15        | 0.60-2.24 | .6762   | 1.16    | 0.70-1.95 | .5615   | 1.33   | 0.89-1.98 | .1703   |
| Coronary angiography                                                     | 1.14        | 0.91-1.43 | .2597   | 1.08    | 0.88-1.31 | .4719   | 1.12   | 0.95-1.32 | .1629   |
| No coronary angiography                                                  | 1.22        | 1.06-1.41 | .0070   | 1.14    | 1.00-1.30 | .0585   | 1.12   | 1.00-1.26 | .0583   |

All models were adjusted for age, sex, socioeconomic status, year of hospitalization, hospital length of stay, comorbidities (diabetes mellitus, hypertension, previous myocardial infarction, ischemic heart disease, congestive heart failure, stroke, dyslipidemia, chronic kidney disease and atrial fibrillation).

Abbreviations: ACEI/ARB, angiotensin-converting enzyme inhibitor/angiotensin II receptor blocker; aHR, adjusted hazard ratio; CI, confidence interval; COPD, chronic obstructive pulmonary disease; DAPT, dual-antiplatelet therapy.

**Table S5. Results of sensitivity analyses: hazard ratio for mortality outcomes, and odds ratio for receiving specific treatment and motility of different grouping of patients**

|                                  | Original model:<br>AMI population |           | Sensitivity analysis 1:<br>propensity score 1:1<br>matching on baseline<br>characters |           | Sensitivity analysis 2:<br>Combine asthma and<br>bronchiectasis patients<br>into COPD group |           | Sensitivity analysis 3:<br>ACS population receiving<br>specific treatment |           |
|----------------------------------|-----------------------------------|-----------|---------------------------------------------------------------------------------------|-----------|---------------------------------------------------------------------------------------------|-----------|---------------------------------------------------------------------------|-----------|
| COPD patient number              | 1921                              |           | 1800                                                                                  |           | 2309                                                                                        |           | 2102                                                                      |           |
| Non-COPD patient number          | 4849                              |           | 1800                                                                                  |           | 4461                                                                                        |           | 5707                                                                      |           |
| Clinical outcomes                | aHR                               | 95% CI    | aHR                                                                                   | 95% CI    | aHR                                                                                         | 95% CI    | aHR                                                                       | 95% CI    |
| In-hospital mortality            | 1.25 <sup>***</sup>               | 1.11-1.41 | 1.28 <sup>***</sup>                                                                   | 1.12-1.48 | 1.28 <sup>***</sup>                                                                         | 1.13-1.44 | 1.24 <sup>**</sup>                                                        | 1.06-1.44 |
| 90-day mortality                 | 1.18 <sup>**</sup>                | 1.06-1.32 | 1.22 <sup>**</sup>                                                                    | 1.08-1.38 | 1.18 <sup>**</sup>                                                                          | 1.06-1.31 | 1.16 <sup>*</sup>                                                         | 1.01-1.33 |
| 1-year mortality                 | 1.20 <sup>***</sup>               | 1.09-1.32 | 1.22 <sup>***</sup>                                                                   | 1.09-1.35 | 1.19 <sup>***</sup>                                                                         | 1.08-1.30 | 1.17 <sup>**</sup>                                                        | 1.04-1.31 |
| Respiratory failure <sup>†</sup> | 1.16 <sup>*</sup>                 | 1.01-1.32 | 1.22 <sup>**</sup>                                                                    | 1.05-1.42 | 1.19 <sup>**</sup>                                                                          | 1.04-1.35 | 1.17 <sup>*</sup>                                                         | 1.01-1.36 |
| Shock <sup>†</sup>               | 0.97                              | 0.86-1.09 | 0.99                                                                                  | 0.86-1.13 | 0.96                                                                                        | 0.86-1.08 | 0.97                                                                      | 0.86-1.10 |
| In-hospital treatments           | aOR                               | 95% CI    | aOR                                                                                   | 95% CI    | aOR                                                                                         | 95% CI    | aOR                                                                       | 95% CI    |
| Dual-antiplatelets               | 0.82 <sup>**</sup>                | 0.72-0.94 | 0.83 <sup>*</sup>                                                                     | 0.71-0.97 | 0.83 <sup>**</sup>                                                                          | 0.73-0.95 | 0.80 <sup>**</sup>                                                        | 0.70-0.92 |
| Anticoagulants                   | 0.76 <sup>***</sup>               | 0.66-0.88 | 0.78 <sup>**</sup>                                                                    | 0.66-0.93 | 0.81 <sup>**</sup>                                                                          | 0.70-0.93 | 1.01                                                                      | 0.77-1.31 |
| β-blockers                       | 0.66 <sup>***</sup>               | 0.59-0.74 | 0.68 <sup>***</sup>                                                                   | 0.59-0.78 | 0.68 <sup>***</sup>                                                                         | 0.61-0.76 | 0.71 <sup>***</sup>                                                       | 0.64-0.79 |
| CCB                              | 1.11                              | 0.98-1.25 | 1.14                                                                                  | 0.99-1.31 | 1.11                                                                                        | 0.99-1.25 | 1.09                                                                      | 0.97-1.21 |

|                      |         |           |        |           |         |           |         |           |
|----------------------|---------|-----------|--------|-----------|---------|-----------|---------|-----------|
| ACEI/ARB             | 0.83**  | 0.73-0.93 | 0.85*  | 0.74-0.98 | 0.84**  | 0.75-0.94 | 0.87*   | 0.77-0.97 |
| Statin               | 0.85**  | 0.75-0.96 | 0.85*  | 0.74-0.98 | 0.80*** | 0.72-0.90 | 0.91    | 0.81-1.02 |
| Coronary angiography | 0.76*** | 0.67-0.86 | 0.79** | 0.68-0.91 | 0.79*** | 0.70-0.89 | 0.82**  | 0.72-0.93 |
| PCI                  | 0.78*** | 0.69-0.88 | 0.79** | 0.69-0.91 | 0.80*** | 0.71-0.90 | 0.82*** | 0.73-0.91 |
| CABG                 | 0.57*** | 0.41-0.77 | 0.65*  | 0.46-0.93 | 0.69**  | 0.52-0.91 | 0.66**  | 0.51-0.86 |

\*  $P < .05$ ; \*\*  $P < .01$ ; \*\*\*  $P < .001$ ;

† : adjusted odds ratio

All models were adjusted for age, sex, socioeconomic status, length of hospital stay, year of hospitalization and comorbidities (diabetes mellitus, hypertension, previous myocardial infarction, ischemic heart disease, congestive heart failure, stroke, dyslipidemia, chronic kidney disease and atrial fibrillation).

Abbreviations: ACEI/ARB, angiotensin-converting enzyme inhibitor/angiotensin II receptor blocker; ACS, acute coronary syndrome; aHR, adjusted hazard ratio; AMI, acute myocardial infarction; aOR, adjusted odds ratio; CABG, coronary artery bypass grafting; CCB, calcium channel blockers; CI, confidence interval; COPD, chronic obstructive pulmonary disease; PCI, percutaneous coronary intervention
